# Supplementary material
Source: publisher site journal article supplement (https://www.dovepress.com/article/542175)
Supplement: Supplementary file 1 [file Supplementary%20table%201_1.docx]

**Supplementary Table S1** Information about the DEGs identified

| DEGs | Gene name |  |  |
| --- | --- | --- | --- |
| Upregulated  (216) | ENSG00000250874 ABRA TKTL1 ENSG00000264727 ENSG00000287226  LINC02240 BOLL C4orf54 ENSG00000290652 ENSG00000284600 ENSG00000287548 ENSG00000254645 ENSG00000227496 DEFA3 LINC01673  ENSG00000284957 ENSG00000229955 ENSG00000237212 PCDH9 LINC02945  SKOR1-AS1 DEFA4 KBTBD11-AS1 ENSG00000261837 PDLIM7-AS1 ENSG00000287630 MLXIPL ENSG00000248516 LTF ENSG00000290581  CACNG1 SPATA13-AS1 LINC01168 CGB1 GLP1R TTC9B LINC01260  MGC27382 LINC01546 BPI ENSG00000255375 ENSG00000273476  ENSG00000288765 CHRDL2 CEACAM8 ENSG00000229065  OLFM4 ENSG00000270066 IRS4 ENSG00000266869 ENSG00000222022  ENSG00000290674 TPTE TBC1D3G MPO H1-3 AGRP ACTA1 ENSG00000254484 NCAM2 ALPG CCDC148 ENSG00000258987 CEACAM6  ENSG00000287774 CNBD2 ENSG00000287377 CRCT1 CRISP3 LAMP5  LINC02751 ENSG00000269898 FCRLA ENSG00000232721 CST11  THBS1-IT1 PRTN3 DUOX2 ENSG00000289419 ENSG00000286747  ENSG00000289151 SCAT8 CGB8 ACTA2-AS1 ASB2 LIF ENSG00000229131  ENSG00000290976 NR4A1AS ENSG00000243491 FAM87A ENSG00000261916  ENSG00000282375 ENSG00000273175 MS4A3 PGLYRP1 MMP8 ACTC1  LGALS9B PRAC2 ENSG00000285679 COMP ENSG00000288100 SYNPO2L-AS1 TREM1 COX7B2 CTXND1 LBHD2 RXRG EGR1 LINC01687 SAA1  ENSG00000286810 ENSG00000275552 CXCL1 ENSG00000273353  MYH6 ENSG00000287665 PURPL GAP43 ENSG00000287358  ENSG00000286458 SLC22A2 DLGAP1 LINC00334 EDIL3-DT  ENSG00000286621 LINC02972 ASB15 CAMP ENSG00000286116  ENSG00000263547 ENSG00000289317 GALNT5 APOB CLEC12B  ENSG00000260719 ENSG00000283638 CCN1 ENSG00000260672  LINC01262 MYO1A ENSG00000259807 PCDHB8 EGR3 HBG2 CCN2  AOC4P ACTG2 ENSG00000287200 CR1L PCDH17 NR2E3 ADGRF1  ENSG00000237870 ENSG00000261216 CNN1 HTRA3 LINC02587  ENSG00000259362 CCDC144A CYP27C1 MAMDC2-AS1 CRYM  ENSG00000259306 CCL2 TMEM233 NR4A1 PTGFR C2CD4B TDO2  HBA2 VASH1-DT UTS2 AOC3 CACNA1B ABCG4 MYOM2 ZNF730  SGPP2 FIBCD1 ADRB3 CNTNAP3B LINC01515 NAV2-AS5 ITIH3  ITIH2 TMEM158 RAB44 CFTR KHDRBS2 THBS1 ENSG00000285280  MIR4713HG ENSG00000280486 ITGA11 GOLGA7B LINC01876  SALL4 TSPEAR-AS2 SHROOM3-AS1 KCNIP4 KLHL14 ARSI PLA2G2A GRK5-IT1 AZU1 IGHG4 GPC6 TAGLN ENSG00000267886 TNFSF15 TRIL NPIPB15 LRRN3 CSRNP3 | | |
| Downregulated  (289) | PLA2G2D NPY OR7A5 CALB2 ENSG00000287498 LINC02692 ENSG00000248318 ENSG00000289111 CFAP107 BARX1 LINC00160  ENSG00000289173 OR13A1 BRINP3 LINC01166 ENSG00000291262  TMSB15C ENSG00000285790 ENSG00000228008 ENSG00000258740  OR1Q1 ENSG00000255506 EPGN OR7D2 ENSG00000280384 ENSG00000276422 DIAPH1-AS1 ENSG00000249150 ENSG00000285570  ENSG00000251148 LINC02130 ENSG00000270050 ENSG00000284823  SPDYE11 AGXT OR5H14 ENSG00000254237 MEI4 ENSG00000276527  PCK1 PADI1 RBP4 TRBV19 CDC42EP3-AS1 ENSG00000289609 SH3GL2  SERPINA11 ENSG00000267504 MT1H ENSG00000272510 ENSG00000289425  CPEB1-AS1 RD3 IRGM ENSG00000274508 ENSG00000291226 LINC01998  KCNB2 FAM83A ZNF280A LINC02783 SIGLEC8 ENSG00000289398 FAM83A-AS1 LINC02771 BHLHE22 ENSG00000290855 OR2T11 NEU4  CCR9 IGLC3 ENSG00000266805 ENSG00000275676 HLA-G SERPINA10  PCDH20 RFPL4B LAIR2 ENSG00000283914 IGLC2 MB SMIM36 PPP2R2C  SLC6A3 ENSG00000230628 SPINK1 REG3G IGSF23 LINC02544 ENTPD2  LINC02863 SYT8 UPK1B CNTNAP4 IL9R ENSG00000278903 CLDN14-AS1  TNNI2 LINC02938 ENSG00000270951 SCEL OR7C1 CPNE4 ENSG00000269553 MISP CTCFL MS4A15 LINC00511 LINC02795 FLJ13224  LINC00311 LINC02068 ENSG00000275709 GPRIN2 GKN1 ITPRID1 TUBA3D  MYPN ENSG00000290785 COX8C LAMA3 MAGED4B GPR50 ZBED2 MED4-AS1 HLA-DRB6 GPER1 ENSG00000269976 ENSG00000278817 ENSG00000273374 ENSG00000269951 LINC02084 ENSG00000253125 LINC03017 RIMS4 A2ML1 BTNL9 RASSF10 MMP2-AS1 OR2I1P BIRC7 ENSG00000278607 GAPDH-DT PCSK2 ENSG00000270933 MT1X RUFY4 ENKUR DDX25 CRABP2 IL36G ENSG00000287555 OR2AT4 FAM153CP  CST6 PDE9A-AS1 IGSF10 FA2H LINC02570 PANX3 DRP2 PTHLH ENSG00000290839 RAB6C ENSG00000248927 ENSG00000289939 KLRC2  TDRD1 LINC02518 LINC01792 ENSG00000287093 SFN NKAIN1 CCDC201  ENSG00000287713 FGF9 ENSG00000255847 FILNC1 ENSG00000261783  ENSG00000255310 HS1BP3-IT1 LINC02384 PTCRA MYOZ1 ENSG00000232628 ENSG00000289053 CBY2 ENSG00000291255 ENSG00000290531 VWCE FCRL5 ENSG00000259702 SLC38A5 CHRNE  RPL37A-DT CCL18 CLNK SLPI CCN3 ENSG00000286602 ENSG00000290553  TUBB4A ENSG00000273341 PNCK DRD1 ITLN1 DNASE1L3 SLC2A5  CXCR6 LINC01709 ENSG00000270210 GPR150 ENSG00000269918 ENSG00000236098 PTGES2-AS1 PDCD1LG2 ATP13A4 DLK2 ENSG00000261104 MALRD1 ENSG00000231713 PRR15-DT PRKCQ HK2  LUNAR1 GALNT6 TMEM31 ENSG00000287787 ENSG00000289594 HCAR2  ENSG00000250519 INAVA ISM2 HCAR1 ERP27 ENSG00000253270 ENSG00000290549 TRGC2 CPLX1 TNFSF10 ARHGEF7-AS2 CHP2 MPZL2  MMP1 ENSG00000262133 REEP1 CAPG SPDYC GAD1 RIMKLA RAB6C-AS1  C12orf75 HRCT1 FAM174B ENSG00000290755 IRX2-DT IL18BP GPIHBP1  OVOL2 SLC38A3 NPTX1 ENSG00000287264 HIF1A-AS3 LINC01828  HEXB SLC30A4-AS1 ENSG00000287884 SLAMF6 SLC2A12 HILPDA  ASTN2 WWTR1-AS1 RGS1 PLD5 CKMT2 ST8SIA1 SLC7A9 AP3B2 SPATA46  TNKS2-DT LY6E-DT PTGES RTN4R ENSG00000278384 GPR146 PTN ENSG00000229178 ADORA3 PRSS22 | | |

A total of 505 DEGs were identified, including 216 upregulated DEGs and 289 downregulated DEGs.
